# Supplementary material for: Persistent Infiltration and Impaired Response of Peripherally-Derived Monocytes after Traumatic Brain Injury in the Aged Brain
Source: PubMed Central journal article supplement (PMC6032263; doi:10.3390/ijms19061616), 2018-05-30
Supplement: ijms-19-01616-s001.pdf [file ijms-19-01616-s001.pdf]

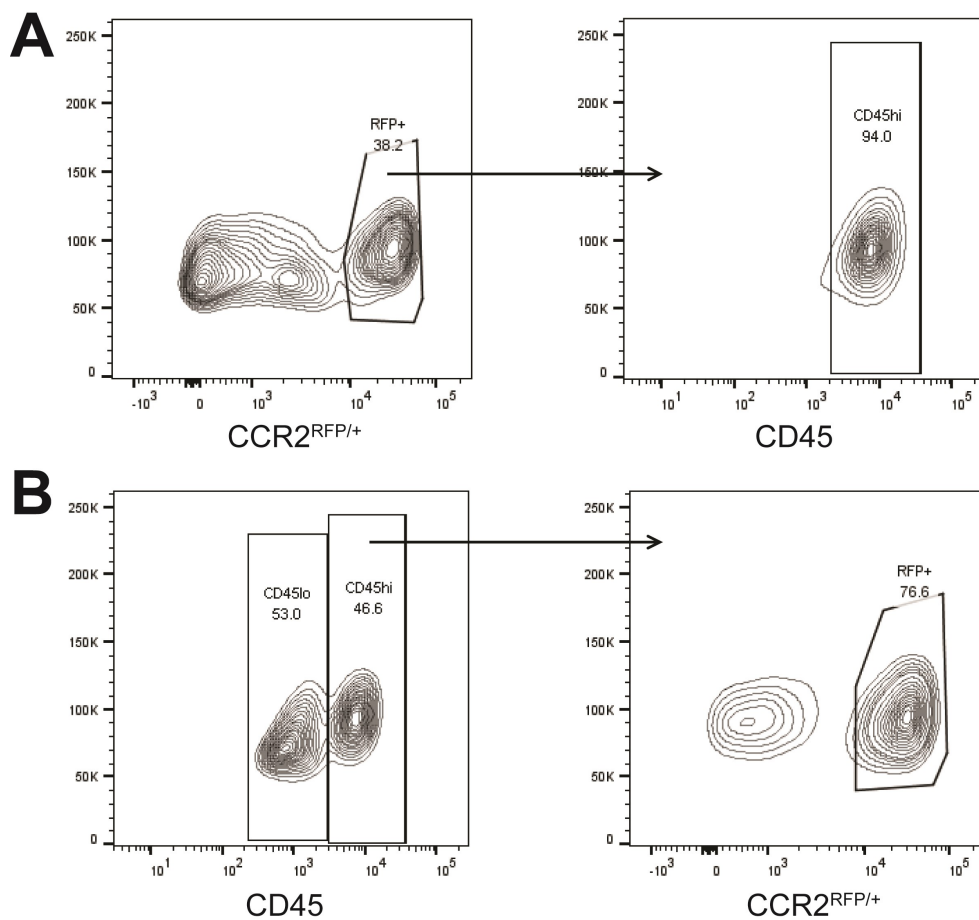

**Figure S1.** Majority of CCR2<sup>+</sup> cells are CD45<sup>hi</sup> and vice versa. **(A)** Representative flow cytometry profile showing that the majority of CCR2<sup>+</sup> (gated from live, single, CD11b<sup>+</sup> population from an injured, aged brain) monocytes are CD45<sup>hi</sup>. **(B)** Representative flow cytometry profile showing that majority of CD45<sup>hi</sup> monocytes gated from the same population as **(A)** are CCR2<sup>+</sup>.

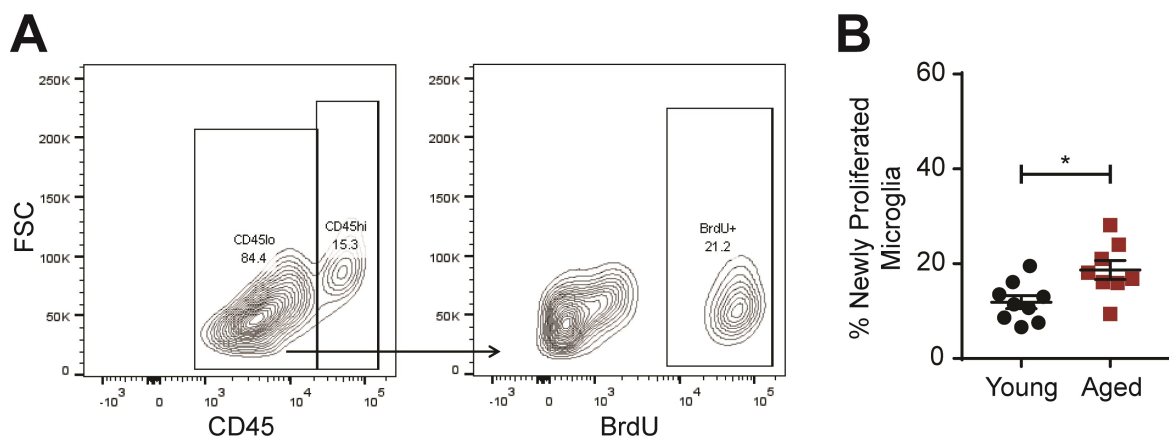

**Figure S2.** Age increases resident microglia (CD45<sup>lo</sup>) proliferation in the injured brain at 4 dpi. **(A)** Representative flow cytometry profile for newly proliferated resident microglia. CD45<sup>lo</sup> microglia were first gated from the CD11b<sup>+</sup>, F4/80<sup>+</sup> population (right). BrdU signal is then gated. Example images are from an aged animal. **(B)** Percent of resident microglia (CD45<sup>lo</sup>) with BrdU<sup>+</sup> signal. Age significantly increases the number of resident microglia that proliferated between 3 and 4 dpi. Data are means  $\pm$  SEM (n = 8-9; Student's t-test, \*p<0.05).

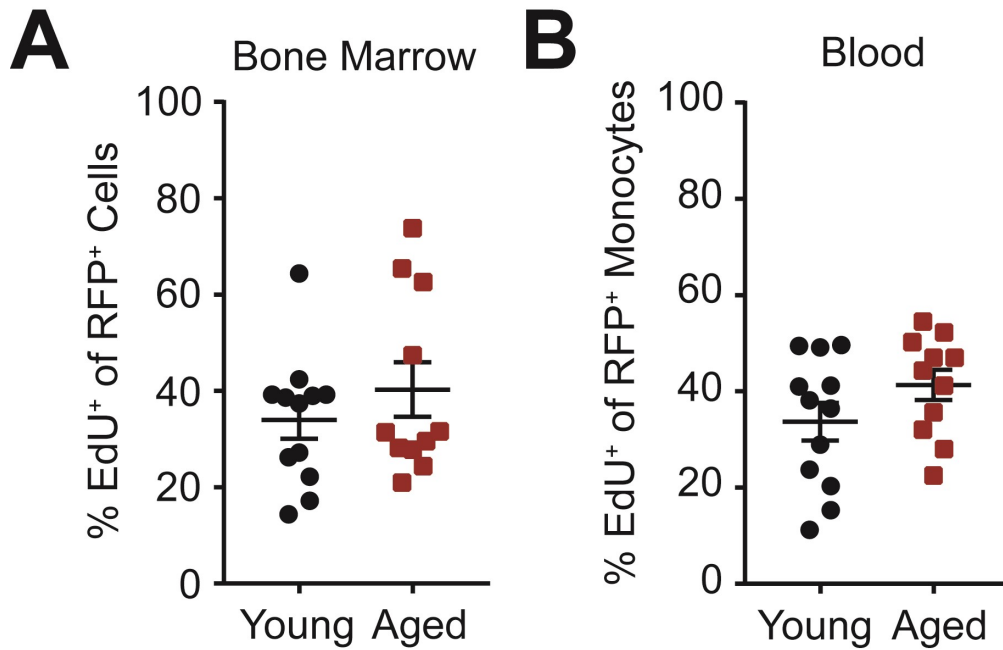

**Figure S3.** Age does not significantly increase new CCR2<sup>+</sup> (RFP<sup>+</sup>) cells in the bone marrow or blood between 3 and 4 dpi. **(A)** Two injections of EdU were given to TBI animals between 3 and 4 dpi. EdU-positive cells were gated from CD11b<sup>+</sup>, CCR2<sup>+</sup> populations from the bone marrow. Age did not significantly increase the proliferation of CCR2<sup>+</sup> (RFP<sup>+</sup>) cells between 3-4 dpi (n=11-12). **(B)** CD11b<sup>+</sup>, CCR2<sup>+</sup> cells were similarly gated from the blood. Age did not significantly increase the number of EdU-labeled monocytes in the blood (n=11-12; Student's t-test, p=0.14).

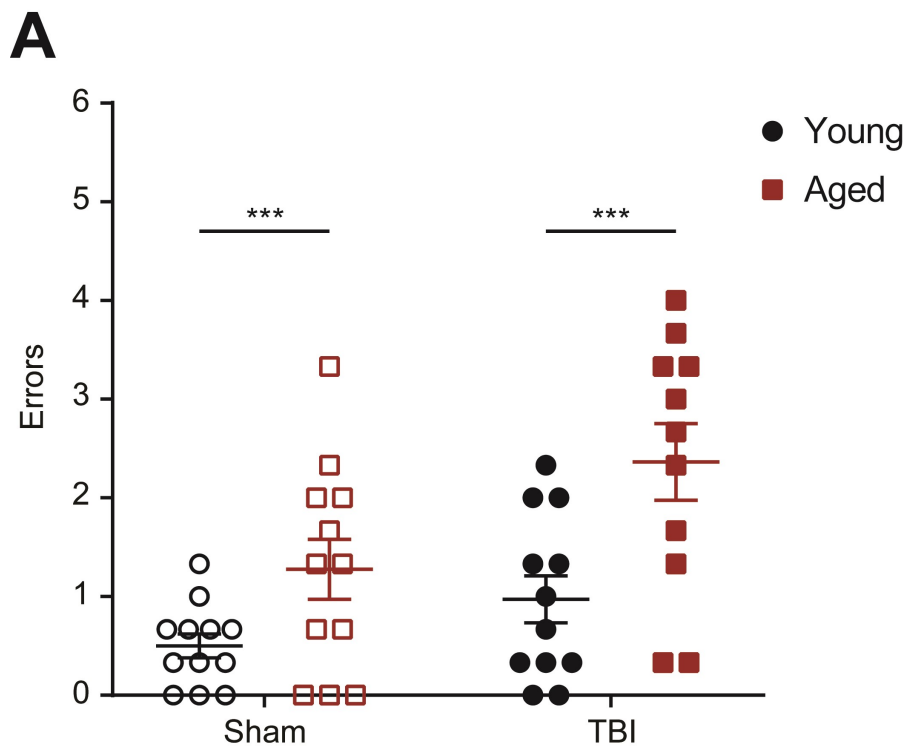

**Figure S4.** Age significantly impairs memory deficits on the radial arm water maze (RAWM) for sham and TBI animals at 30 dpi. **(A)** Individual animal performance during the memory test (block 11; 30 dpi). Injury and Age both increases the errors made. Aged, injured animals committed the most errors. (n=11-12; two-way ANOVA, significant main effects of Age and TBI, no significant Interaction, \*\*\*p<0.001).

---

**A**

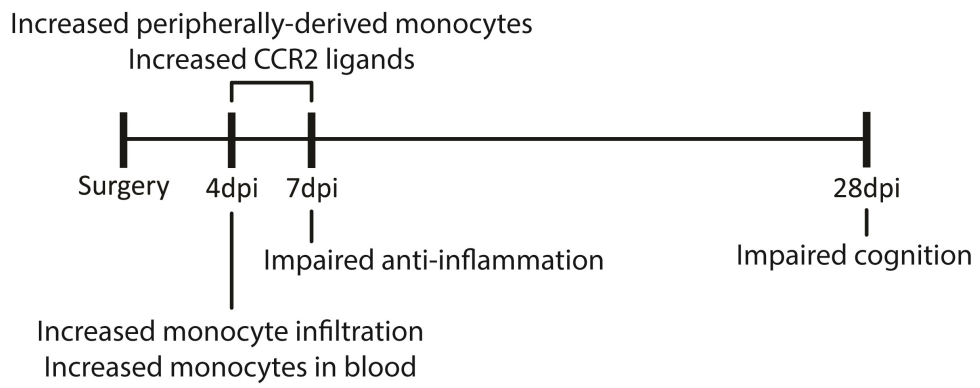

**Figure S5.** Time course of the present findings showing age-exacerbated TBI outcome.
